# Supplementary material for: Extended recommendations on the nomenclature for microbial catabolites of dietary (poly)phenols, with a focus on isomers
Source: Royal Society of Chemistry journal article supplement (doi:10.1039/d4fo06152g), 2025-01-01
Supplement: d4fo06152g1.pdf [file d4fo06152g1.pdf]

## Supplementary Information

### Extended recommendations on the nomenclature for microbial catabolites of dietary (poly)phenols, with a focus on isomers

Claudio Curti <sup>a</sup>, Michael N. Clifford <sup>b,c</sup>, Colin D. Kay <sup>d</sup>, Pedro Mena <sup>e,f</sup>, Ana Rodriguez-Mateos <sup>g</sup>, Daniele Del Rio <sup>e,f</sup>, Gordon J. McDougall <sup>h</sup>, Gary Williamson <sup>c</sup>, Cristina Andres-Lacueva <sup>ij</sup>, Letizia Bresciani <sup>e</sup>, Britt Burton Freeman <sup>k</sup>, Aedin Cassidy <sup>l</sup>, Yves Desjardin <sup>m</sup>, Cesar G. Fraga <sup>n</sup>, Chris. C.I. Gill <sup>o</sup>, Paul A. Kroon <sup>p</sup>, Nikolai Kuhnert <sup>q</sup>, Iziar, A. Ludwig <sup>r</sup>, Claudine Manach <sup>s</sup>, Dragan Milenkovic <sup>t</sup>, Cláudia Nunes dos Santos <sup>u</sup>, Patricia I. Oteiza <sup>n</sup>, Gema Pereira-Caro <sup>v</sup>, Francisco A. Tomás Barberán <sup>w</sup>, David S. Wishart <sup>x</sup> and Alan Crozier <sup>y,z,\*</sup>

<sup>a</sup>*BioOrganic Synthesis Unit, Department of Food and Drug, University of Parma, Parma, Italy*

<sup>b</sup>*School of Bioscience and Medicine, University of Surrey, Guildford, UK*

<sup>c</sup>*Department of Nutrition, Dietetics and Food, Monash University, Notting Hill, Victoria, Australia* <sup>d</sup>*Department of Pediatrics, University of Arkansas Medical School, Little Rock, AR, USA*

<sup>e</sup>*Human Nutrition Unit, Department of Food and Drug, University of Parma, Parma, Italy;*

<sup>f</sup>*Microbiome Research Hub, University of Parma, Parma, Italy*

<sup>g</sup>*Department of Nutritional Sciences, Kings College, London, UK*

<sup>h</sup>*The James Hutton Research Institute, Invergowrie, Dundee, UK*

<sup>i</sup>*Department of Nutrition, Food Science and Gastronomy, University of Barcelona, Barcelona, Spain*

<sup>j</sup>*CIBER Frailty and Healthy Aging (CIBERfes), Institute of Health Carlos III, Barcelona, Spain*

<sup>k</sup>*Department of Food Science and Nutrition, Illinois Institute of Technology, Chicago, ILL, USA*

<sup>l</sup>*Institute for Food Security, Queen's University, Belfast, Northern Ireland, UK*

<sup>m</sup>*Institute for Nutrition and Functional Food, Laval University, Québec, Canada*

<sup>n</sup>*Department of Nutrition, University of California, Davis, CA, USA*

<sup>o</sup>*Nutrition Innovation Centre for Food and Health, Ulster University, Coleraine, United Kingdom*

<sup>p</sup>*Quadram Institute, Norwich, UK*

<sup>q</sup>*School of Science, Constructor University, Bremen, Germany*

<sup>r</sup>*Center for Nutrition Research, University of Navarra, Pamplona, Spain*

<sup>s</sup>*Université Clermont Auvergne, INRAE, Human Nutrition Unit, Clermont-Ferrand, France*

<sup>t</sup>*Plants for Human Health Institute, Food Bioprocessing and Nutrition Sciences Department, North Carolina State University, Kannapolis, NC, USA*

<sup>u</sup>*NOVA Medical School, NOVA University of Lisbon, Lisbon, Portugal*

<sup>v</sup>*Department of Food Science and Health, Andalusian Institute of Agricultural and Fisheries Research and Training, Córdoba, Spain*

<sup>w</sup>*Quality, Safety and Bioactivity of Plant-Derived Foods CEBAS-CSIC, Espinardo University Campus, Murcia, Spain*

<sup>x</sup>*Department of Biological Sciences, University of Alberta, Edmonton, Canada*

<sup>y</sup>*Department of Chemistry, King Saud University, Riyadh, Saudi Arabia*

<sup>z</sup>*School of Medicine, Dentistry and Nursing, University of Glasgow, Glasgow, UK.*

\* Corresponding author

E-mail: alan.crozier44@gmail.com

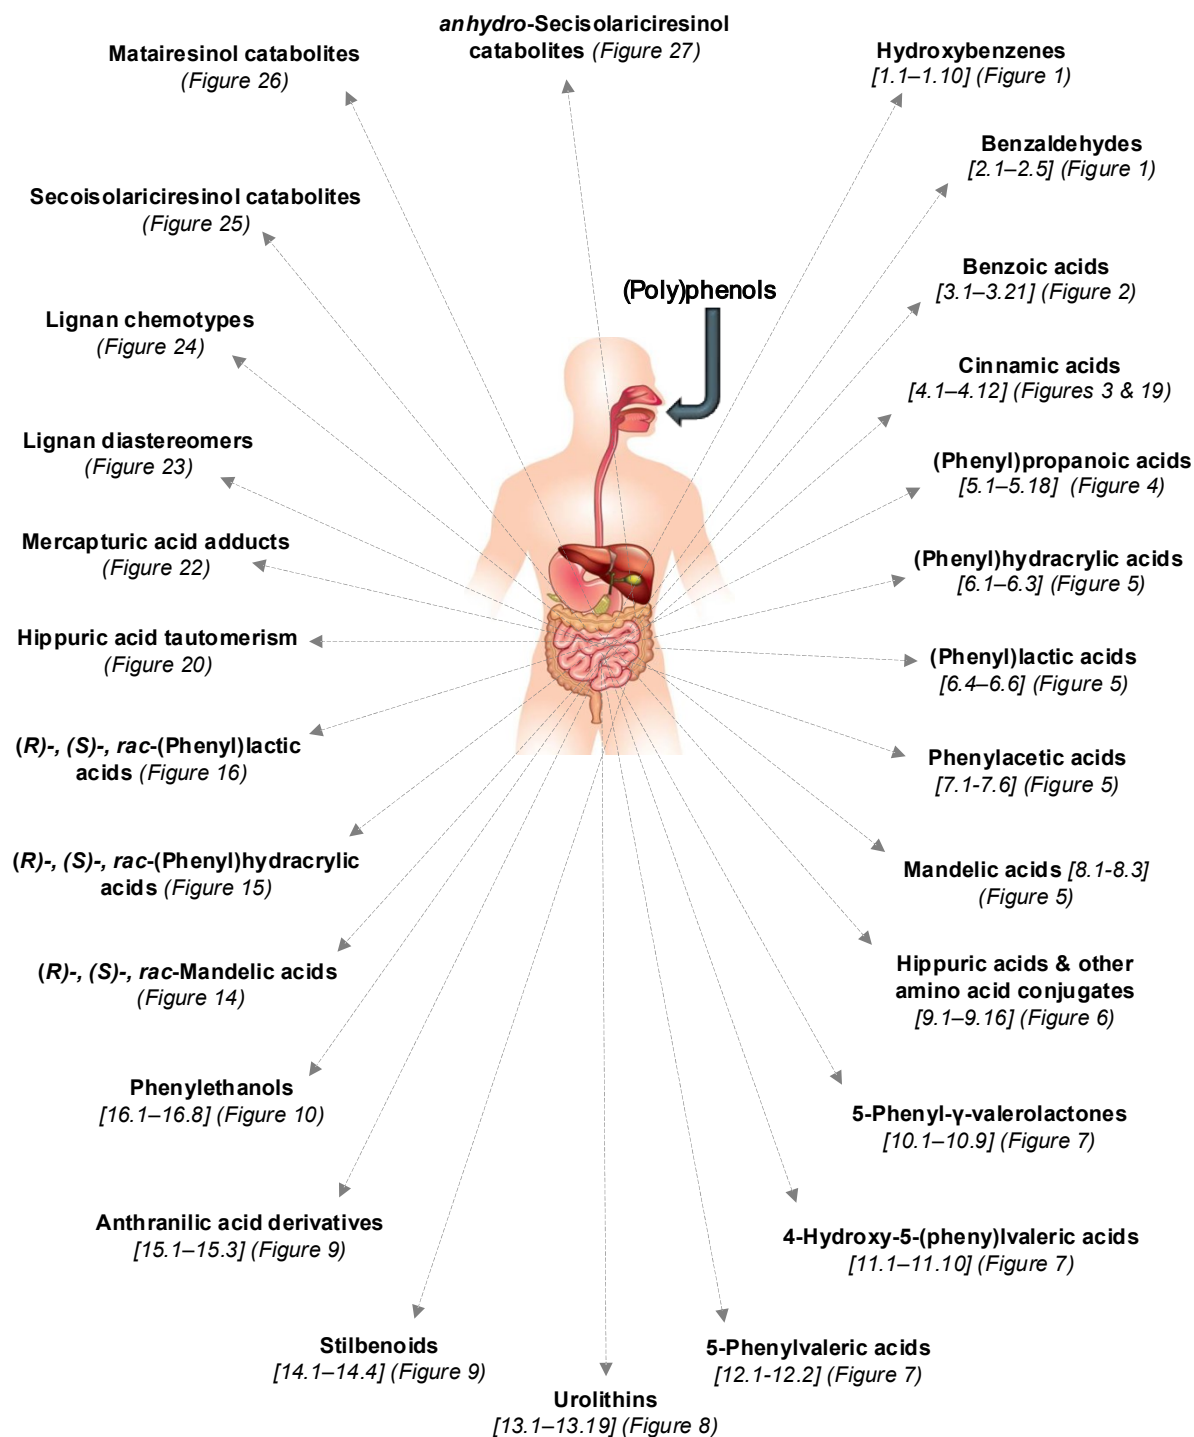

**Fig. SI 1.** An outline of the main categories of colonic phenolic catabolites included in the Curti et al. paper, with information on the Figures where the relevant structures are illustrated, and in italicized square parentheses where information on their properties is summarized in Table 1.
